# Supplementary material for: Wet and dry seasons modulate coastal coccolithophore dynamics off South-western Nigeria (Gulf of Guinea)
Source: Copernicus journal article supplement (doi:10.5194/bg-22-7865-2025), 2025-12-09
Supplement: Supplementary file 1 [file egusphere-2025-3201_Supplementary.docx]

**Supplementary material to:**

**Wet and dry seasons modulate coastal coccolithophore dynamics off Southwestern Nigeria (Gulf of Guinea)**

Falilu O. Adekunbi1,2,3, Michaël Grelaud3*, Gerald Langer3,4, Lucian O. Chukwu1, Marta Alvarez5, Shakirudeen Odunuga6, Kai G. Schulz7, Patrizia Ziveri3,8,9

1Department of Marine Sciences, Faculty of Science, University of Lagos (UNILAG), Lagos, Nigeria

2Nigerian Institute for Oceanography and Marine Research, (NIOMR) Lagos, Nigeria

3Institut de Ciència i Tecnologia Ambientals (ICTA-UAB), Universitat Autònoma de Barcelona, Barcelona, Spain

4Marine Biogeosciences, Alfred-Wegener-Institut, Helmholtz-Zentrum für Polar- und Meeresforschung, Bremerhaven, Germany

5Instituto Español de Oceanografía (IEO-CSIC), A Coruña, Spain

6Department of Geography, Faculty of Social Sciences, University of Lagos (UNILAG), Lagos, Nigeria

7Centre for Coastal Biogeochemistry, School of Environment Science and Engineering, Southern Cross University, Lismore, NSW 2480, Australia

8Catalan Institution for Research and Advanced Studies (ICREA), Barcelona, Spain

9Departamento de Biología Animal, Biología Vegetal y Ecología, Universitat Autònoma de Barcelona, Barcelona, (ICTA-UAB), Spain

*Correspondent authors: michael.grelaud@uab.cat

1. Coccolithophore identification


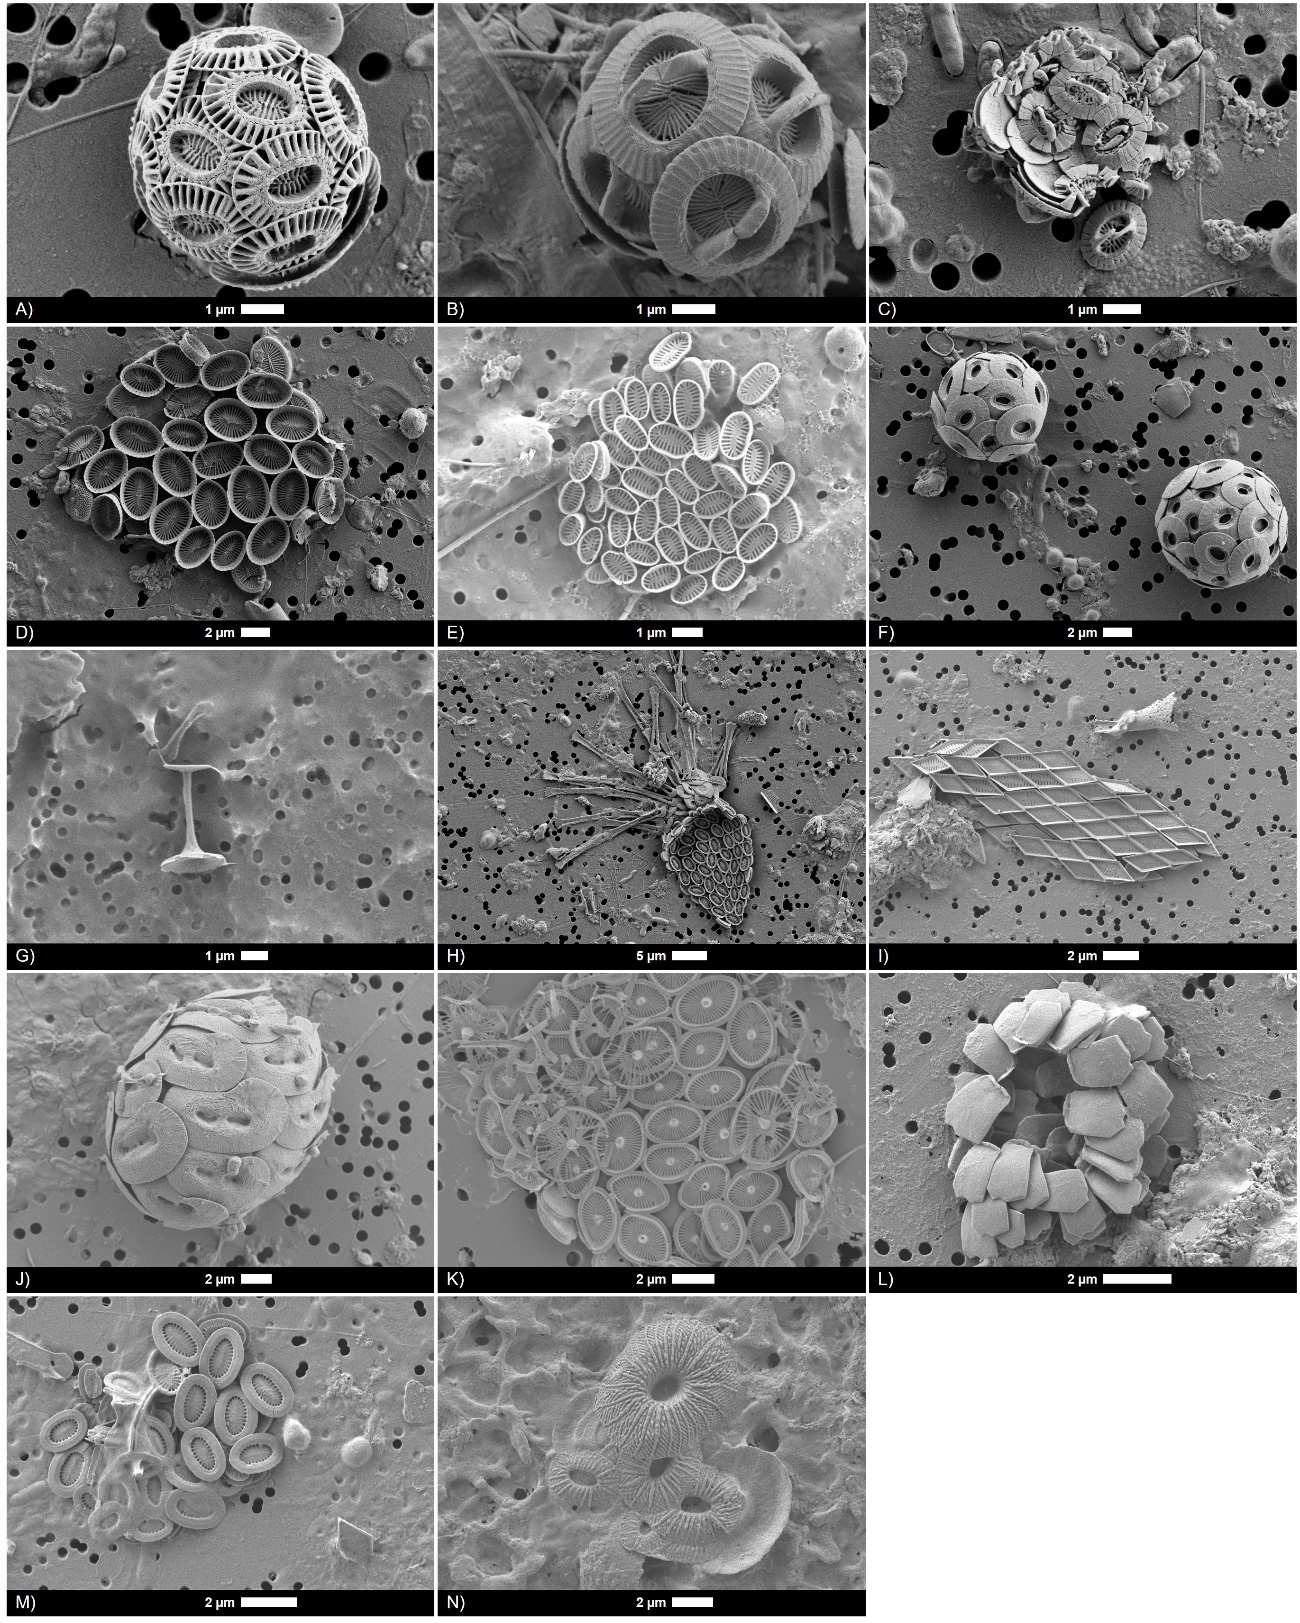


Figure S1: Scanning electron Microscope (SEM) photomicrographs of coccolithophore off Lagos coastal waters A) *Emiliania huxleyi*, B) *Gephyrocapsa oceanica*, C) *Gephyrocapsa ericsonii*, D) *Syracosphaera tumularis*, E) *Calciopappus rigidus*, F) *Umbilicosphaera hulburtiana*, G) *Discosphaera tubifera* (coccolith), H) *Michaelsarsia elegans*, I) *Calsiosolenia corselii*, J) *Helicosphaera carteri*, K) *Syracosphaera sp.*, L) *Florisphaera profunda,*  M) *Syracosphaera histrica,* N) *Umbellosphaera tenuis*.

1. Diversity index and richness


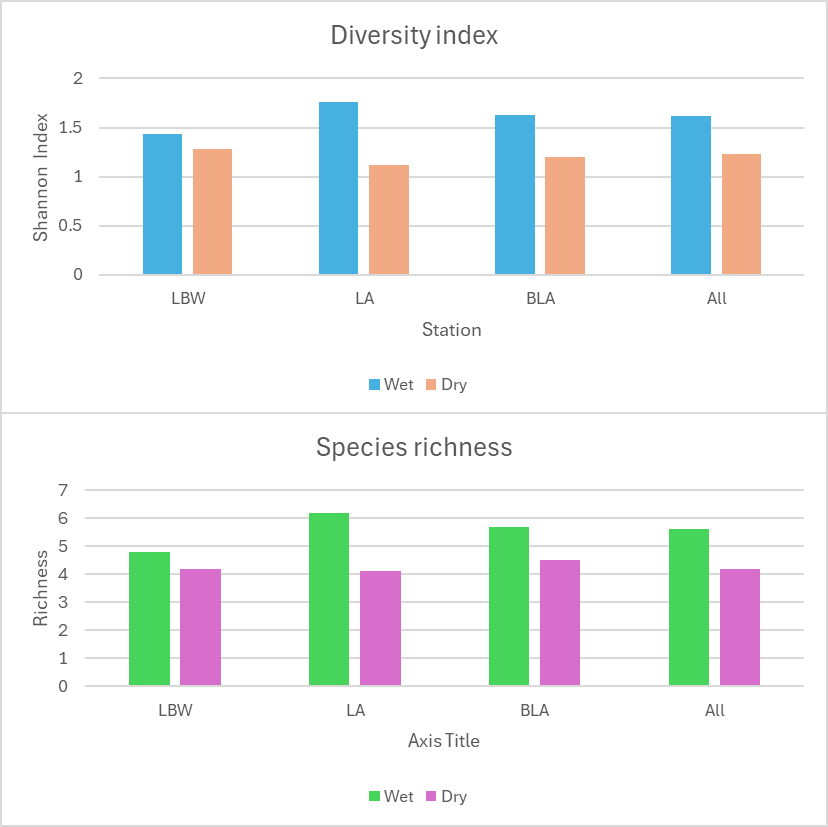


Figure S2: Average seasonal diversity index (top) and species richness (bottom) for three stations (BLA: Beyond Lagos Anchorage, LA: Lagos Anchorage, LBW: Lagos Break-Water) and all stations together (All)

1. Carbonate chemistry variables

Seawater samples for carbonate chemistry analysis were carefully collected from the Niskin bottle into acid-washed 250ml borosilicate glass bottles and poisoned with 50µl saturated HgCl2 solution, as recommended by Dickson et al. (2007). Measurement of samples was performed at the Inorganic Chemical Oceanography (INOCEN) laboratory from the Instituto Español de Oceanografía (IEO-CSIC), Spain. All measurements were done within six months after sampling. While TA and DIC measurements were carried out on 2018 to 2020 samples, TA and pH measurements were performed on 2021 samples due to equipment failure. Derived carbonate system parameters were calculated with the CO2Sys package for MS Excel (Pierrot et al. 2006) using the combination of TA – DIC (2019) or TA – pH (2021) and ancillary data for temperature, salinity and inorganic nutrients. The set of carbonic acid apparent dissociation constants (K1 and K2) of Mehrbach et al. (1973) refitted by Dickson and Millero (1987), the KSO4 constants of Dickson (1990), and the borate constants of Uppström (1974) were chosen.

The DIC measurements were performed through a coulometric determination using a VINDTA 3D system coupled with a UIC 5011 coulometer. The accuracy of DIC measurements was ±2.0 µmol kg-1 as assessed by using Certified Reference Material (CRM, batch #177, DIC = 2067.67 ± 0.44 µmol kg-1) provided by Prof. Andrew Dickson, Scripps Institution of Oceanography, USA.TA was analysed following a double end point potentiometric technique by Pérez and Fraga (1987) further improved in Pérez et al. (2000) using an automatic potentiometric titrator Titrando 909 Metrohm, with a Metrohm Aquatrode Plus and a Pt-1000 probe to monitor the temperature. We used Certified Reference Material (CRM, batch #190, TA = 2218.3 ± 0.77 µmol kg-1) provided by Prof. Andrew Dickson, Scripps Institution of Oceanography, USA, for calibration. The overall analytical precision was ±2 µmol kg-1. In addition to the CRM calibration, an extra drift control was conducted by analyzing an in-house seawater substandard at the beginning and at the end of each analysis session.

Seawater pH was measured using a spectrophotometric procedure (Byrne, 1987), following the methodology described by Clayton and Byrne (1993). The indicator used for measuring absorbance (λA) was a solution of unpurified *m*-cresol purple (UNPUR mCP, Sigma Aldrich) prepared in NaCl (2 mM). Dry cylindrical optical glass 10-cm pathlength cells were filled to overflowing with the sample seawater and immediately stoppered. Cells were immediately stabilized at 25°C. All the absorbance measurements (λA) were obtained in the thermostatted cell compartment (25±0.2 ºC) of a SHIMADZU UV-2600 double beam spectrophotometer with a bandwidth of 1 nm. The temperature was controlled with a JULABO (12L) thermostatic bath. Assessment with Tris buffers and replicate analysis gave an overall analytical accuracy and precision of ±0.002 pH units. pH data is presented on the total scale for in situ conditions.

1. Global coastal coccolithophore standing stocks analysis

Two datasets were used to extract coccolithophore standing stocks: de Vries et al. (2020) and O’Brien (2012). Before processing, the data were organized by station ID, geographic coordinates (latitude and longitude), water depth at which samples were collected, and standing stock values (cells/L). Samples missing one or more of these parameters were excluded, and duplicates were removed. Once the dataset was prepared, it was processed using RStudio (v4.3.1; RStudio Team, 2020). The following R packages were used: readxl (Wickham and Bryan, 2025), tidyverse (Wickham et al., 2019), raster (Hijmans, 2025), sf (Pebesma and Bivand, 2023; Pebesma, 2018), ncdf4 (Pierce, 2025), rnaturalearth (Massicotte and South, 2025), rnaturalearthdata (South et al., 2025), units (Pebesma et al., 2016), geosphere (Hijmans, 2024), and lwgeom (Pebesma, 2025). Bathymetry data were obtained from the GEBCO_2024 Grid (sub-ice topo/bathy) dataset (GEBCO Compilation Group, 2024), and coastline boundaries were derived from the IHO Sea Areas dataset, version 3 (Flanders Marine Institute, 2018).

Here is the script that was used:

# Install necessary packages (run only once, skip if already installed)

install.packages(c("readxl", "tidyverse", "raster", "sf", "ncdf4",

"rnaturalearth", "rnaturalearthdata", "units",

"geosphere", "lwgeom"))

# Load libraries

library(readxl)

library(tidyverse)

library(raster)

library(sf)

library(ncdf4)

library(rnaturalearth)

library(rnaturalearthdata)

library(units)

library(geosphere)

library(lwgeom)

# Load dataset that contains coccolithophore standing stocks along with station ID, coordinates and depth

df <- read_excel("C:/Coccolithophore_Standing_Stocks.xlsx")

# Filter out rows with missing coordinates (important for sf conversion)

df <- df %>%

filter(!is.na(Longitude), !is.na(Latitude)) %>%

filter(between(Longitude, -180, 180), between(Latitude, -90, 90))

# Load GEBCO bathymetry raster to retrieve seafloor depth from coordinates

bathy <- raster("C:/gebco_2024_sub_ice_topo/gebco_2024_sub_ice_topo.nc")

# Unique station coordinates

stations <- df %>%

distinct(StationID, Latitude, Longitude)

# Convert to spatial object

stations_sf <- st_as_sf(stations, coords = c("Longitude", "Latitude"), crs = 4326, remove = FALSE)

# Extract bathymetry

stations$WaterDepth <- raster::extract(bathy, stations_sf)

# Merge bathymetry with full dataframe

df_with_depth <- left_join(df, stations, by = "StationID")

# Download coastline (natural earth)

coastline <- ne_download(scale = 10, type = "coastline", category = "physical", returnclass = "sf")

# Recreate stations_sf for distance calc (with .x columns)

stations_sf <- st_as_sf(df_with_depth, coords = c("Longitude.x", "Latitude.x"), crs = 4326, remove = FALSE)

# Compute distance to nearest coastline

dist_matrix <- st_distance(stations_sf, coastline)

df_with_depth$DistanceToCoast_km <- apply(dist_matrix, 1, min) / 1000 # km

# Save intermediate output

write_csv(df_with_depth, "C:/data_with_bathymetry_and_distance.csv")

# Disable s2 for spatial join (avoids geometry errors in some shapefiles)

sf_use_s2(FALSE)

# Load and process ocean basins shapefile

basins_raw <- st_read("C:/World_Seas_IHO_v3.shp")

# Ensure geometries are valid and projected

basins <- basins_raw %>%

st_make_valid() %>%

st_collection_extract("POLYGON") %>%

st_transform(4326)

# Ensure clean spatial object for join (with same coordinate column names)

stations <- df_with_depth %>%

distinct(StationID, Longitude.x, Latitude.x)

stations_sf <- st_as_sf(stations, coords = c("Longitude.x", "Latitude.x"), crs = 4326, remove = FALSE)

# Perform spatial join with IHO basins

stations_with_basin <- st_join(stations_sf, basins["NAME"])

# Merge basin names into full dataframe

df_final <- left_join(df_with_depth, st_drop_geometry(stations_with_basin), by = "StationID")

# Save final result with depth, coast distance, and ocean basin

write_csv(df_final, "C:/data_with_bathymetry_distance_basins.csv")

1. Principal Component Analysis (PCA)

The PCA between the environmental parameters and the coccolithophore data was conducted with RStudio (v4.3.1, RStudio Team, 2020). The packages FactoMineR (Le et al. 2008) and Factoextra (Kassambra and Mundt, 2020) were used to process the data.

Here is the script that was used:

# Load required libraries for PCA and visualization

library(FactoMineR)

library(factoextra)

# Read and process dataset: All samples combined

PCA_All <- read_excel("C:/PCA_All.xlsx") # Read complete dataset

PCA_All.active <- PCA_All[1:75, 2:15] # Select active variables (rows 1–75, columns 2–15)

res.PCA_All <- PCA(PCA_All.active, graph = FALSE)

fviz_eig(res.PCA_All, addlabel = TRUE, main = "PCA_All", ylim = c(0, 60))

fviz_pca_biplot(res.PCA_All, col.var = "purple")

# Read and process dataset: Dry season samples

PCA_Dry <- read_excel("J:/PCA_Dry.xlsx ") # Read dry season dataset

PCA_Dry.active <- PCA_Dry[1:44, 2:15] # Select active variables (rows 1–44, columns 2–15)

res.PCA_Dry <- PCA(PCA_Dry.active, graph = FALSE)

fviz_eig(res.PCA_Dry, addlabel = TRUE, main = "PCA_Dry", ylim = c(0, 60))

fviz_pca_var(res.PCA_Dry, col.var = "brown")

# Read and process dataset: Wet season samples

PCA_Wet <- read_excel("J:/GoG/PCA_Wet.xlsx ") # Read wet season dataset

PCA_Wet.active <- PCA_Wet[1:33, 2:15] # Select active variables (rows 1–33, columns 2–15)

res.PCA_Wet <- PCA(PCA_Wet.active, graph = FALSE)

fviz_eig(res.PCA_Wet, addlabel = TRUE, main = "PCA_Wet", ylim = c(0, 60))

fviz_pca_var(res.PCA_Wet, col.var = "blue")

References:

de Vries, Joost C; Monteiro, Fanny; Andruleit, Harald; Böckel, Babette; Baumann, Karl-Heinz; Cerino, Federica; Charalampopoulou, Anastasia; Cepek, Martin; Cros, Lluisa; D'Amario, Barbara; Daniels, Chris J; Dimiza, Margarita D; Estrada, Marta; Eynaud, Frédérique; Giraudeau, Jacques; Godrijan, Jelena; Guerreiro, Catarina V; Guptha, M V S; Thierstein, Hans R; Haidar, Ali T; Karatsolis, Boris Theofanis; Kinkel, Hanno; Luan, Qingshan; Malinverno, Elisa; Patil, Shramik M; Mohan, Rahul; Poulton, Alex J; Saavedra-Pellitero, Mariem; Schiebel, Ralf; Smith, Helen Elizabeth Katie; Šupraha, Luka; Takahashi, Kyoma; Okada, H; Triantaphyllou, Maria; Silver, Mary W (2020): Global SEM coccolithophore abundance compilation [dataset]. PANGAEA, <https://doi.org/10.1594/PANGAEA.922933>

Flanders Marine Institute (2018). IHO Sea Areas, version 3. Available online at https://www.marineregions.org/. <https://doi.org/10.14284/323>.

GEBCO Compilation Group (2024) GEBCO 2024 Grid (doi:10.5285/1c44ce99-0a0d-5f4f-e063-7086abc0ea0f)

Hijmans R (2025). raster: Geographic Data Analysis and Modeling. R package version 3.6-32, <https://rspatial.org/raster>.

Hijmans R (2024). *geosphere: Spherical Trigonometry*. R package version 1.5-20, <https://github.com/rspatial/geosphere>.

Kassambra, A., & Mundt, F. (2020). Factoextra: Extract and Visualize the Results of Multivariate Data Analyses (R Package Version 1.0.7). Retrieved from <https://CRAN.R-project.org/package=factoextra>.

Le, S., Josse, J., & Husson, F. (2008). FactoMineR: An R package for multivariate analysis. Journal of Statistical Software, 25(1), 1-18. <https://doi.org/10.18637/jss.v025.i01>

Massicotte P, South A (2025). *rnaturalearth: World Map Data from Natural Earth*. R package version 1.1.0, <https://docs.ropensci.org/rnaturalearth/>.

O'Brien, Colleen J (2012): Global distributions of coccolithophores abundance and biomass - Gridded data product (NetCDF) - Contribution to the MAREDAT World Ocean Atlas of Plankton Functional Types [dataset]. PANGAEA, <https://doi.org/10.1594/PANGAEA.785092>

Pebesma E (2025). *lwgeom: Bindings to Selected 'liblwgeom' Functions for Simple Features*. R package version 0.2-15, <https://r-spatial.github.io/lwgeom/>.

Pebesma E, Bivand R (2023). Spatial Data Science: With applications in R. Chapman and Hall/CRC. doi:10.1201/9780429459016, <https://r-spatial.org/book/>.

Pebesma E (2018). “Simple Features for R: Standardized Support for Spatial Vector Data.” The R Journal, 10(1), 439–446. doi:10.32614/RJ-2018-009, <https://doi.org/10.32614/RJ-2018-009>.

Pebesma E, Mailund T, Hiebert J (2016). “Measurement Units in R.” *R Journal*, **8**(2), 486–494. [doi:10.32614/RJ-2016-061](https://doi.org/10.32614/RJ-2016-061).

Pierce D (2025). ncdf4: Interface to Unidata netCDF (Version 4 or Earlier) Format Data Files. R package version 1.24, <https://CRAN.R-project.org/package=ncdf4>.

RStudio Team. (2020). RStudio: Integrated Development for R. RStudio, PBC. <https://www.rstudio.com/>

South A, Michael S, Massicotte P (2025). rnaturalearthdata: World Vector Map Data from Natural Earth Used in 'rnaturalearth'. R package version 1.0.0.9000, <https://docs.ropensci.org/rnaturalearthdata/>.

Wickham H, Bryan J (2025). readxl: Read Excel Files. R package version 1.4.5, https://github.com/tidyverse/readxl, <https://readxl.tidyverse.org>.

Wickham H, Averick M, Bryan J, Chang W, McGowan LD, François R, Grolemund G, Hayes A, Henry L, Hester J, Kuhn M, Pedersen TL, Miller E, Bache SM, Müller K, Ooms J, Robinson D, Seidel DP, Spinu V, Takahashi K, Vaughan D, Wilke C, Woo K, Yutani H (2019). “Welcome to the tidyverse.” Journal of Open Source Software, 4(43), 1686. doi:10.21105/joss.01686.
