# Supplementary material for: Wet and dry seasons modulate coastal coccolithophore dynamics off South-western Nigeria (Gulf of Guinea)
Source: Copernicus journal article supplement (doi:10.5194/bg-22-7865-2025), 2025-12-09
Supplement: Supplementary file [file bg-22-7865-2025-supplement-title-page.pdf › bg-22-7865-2025-supplement-title-page.pdf]

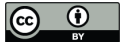

*Supplement of*

**Wet and dry seasons modulate coastal coccolithophore dynamics off South-western Nigeria (Gulf of Guinea)**

**Falilu O. Adekunbi et al.**

*Correspondence to:* Michaël Grelaud ([michael.grelaud@uab.cat](mailto:michael.grelaud@uab.cat))

- [bg-22-7865-2025-supplement-title-page.pdf](#)
- [egusphere-2025-3201-supplement-version3](#)
  - [egusphere-2025-3201\\_Supplementary.docx](#)
  - [egusphere-2025-3201\\_Supplementary\\_Tables.xlsx](#)

The copyright of individual parts of the supplement might differ from the article licence.
